# Supplementary material for: Enzymatically-induced dynamic assemblies from surface functional stomatocyte nanoreactors
Source: Royal Society of Chemistry journal article supplement (doi:10.1039/d4tb01320d), 2024-01-01
Supplement: d4tb01320d1.pdf [file d4tb01320d1.pdf]

## ESI - Enzymatically-induced, dynamic Assemblies in Surface Functional Stomatocyte Nanoreactors

NMR spectra of the azide functional macroinitiator, synthesized methoxy- and azide-terminated poly(ethylene glycol)-*b*-poly(styrene) block copolymers

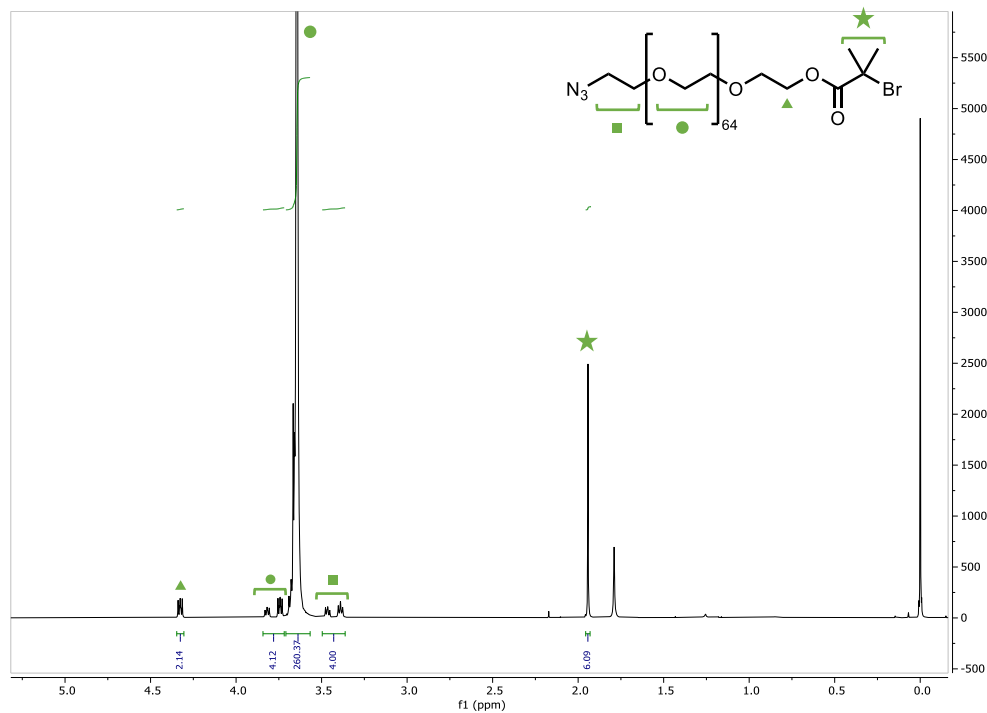

SI Figure. 1 Structure <sup>1</sup>H-NMR spectrum and associated peak assignments of the azide-terminated macromolecular initiator.

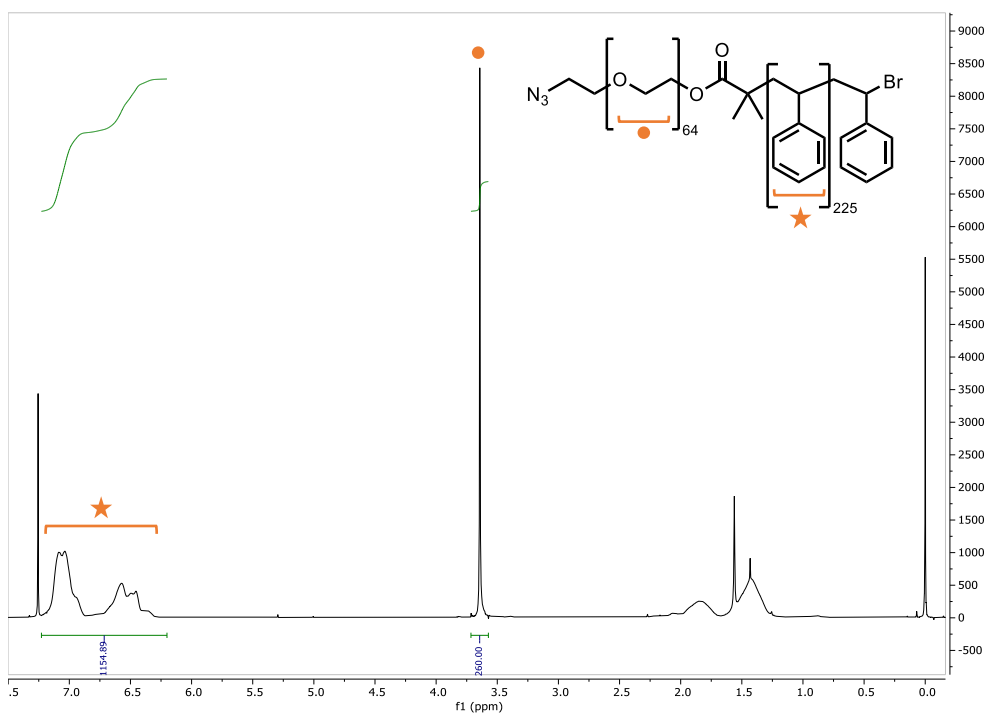

**SI Figure. 2** Structure and  $^1\text{H-NMR}$  spectrum and associated peak assignments of the polymerized azide-terminated polymer.

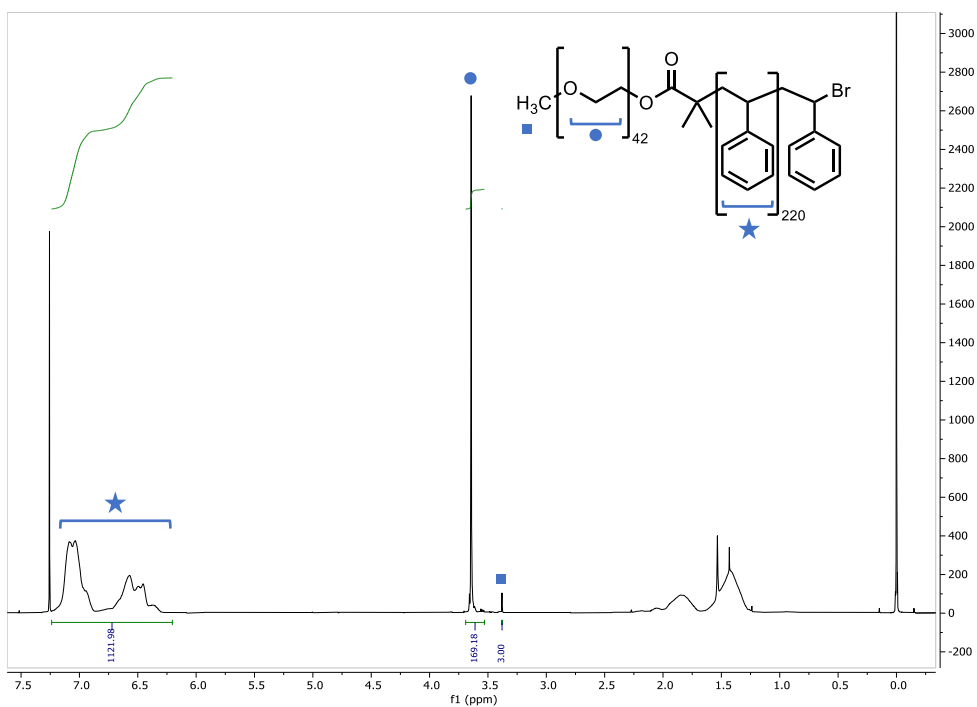

**SI Figure. 3** Structure and  $^1\text{H-NMR}$  spectrum and associated peak assignments of the polymerized methoxy-terminated polymer.

## GPC Chromatograms of synthesized polymers and macroinitiators

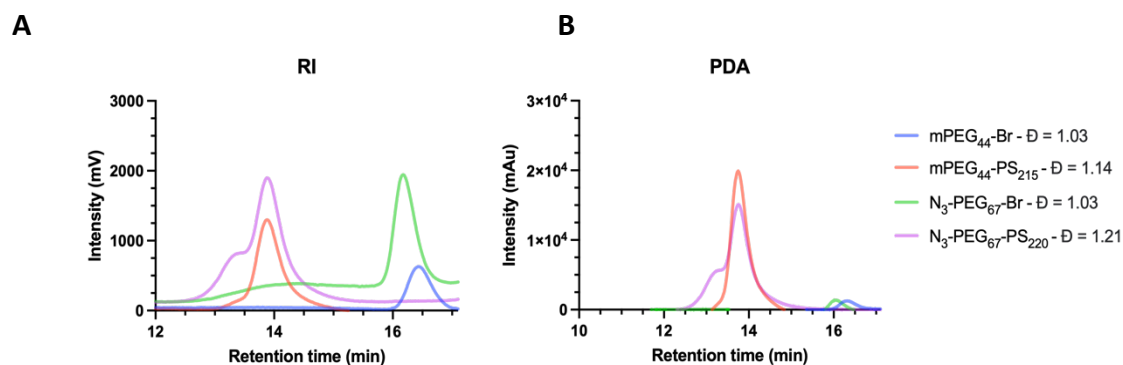

SI Figure. 4 GPC Chromatograms of synthesized polymers. A) Refractive index and B) UV trace chromatograms and dispersity indices of azide- and methoxy-terminated macroinitiators and polymerized diblocks.

## Mass spectra of DBCO-His<sub>2</sub>

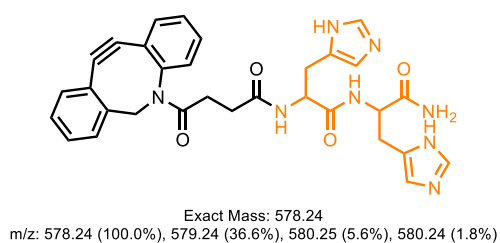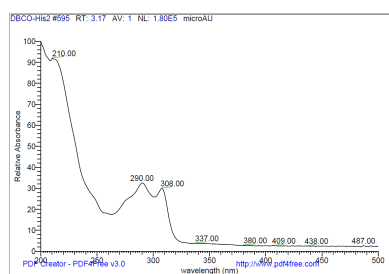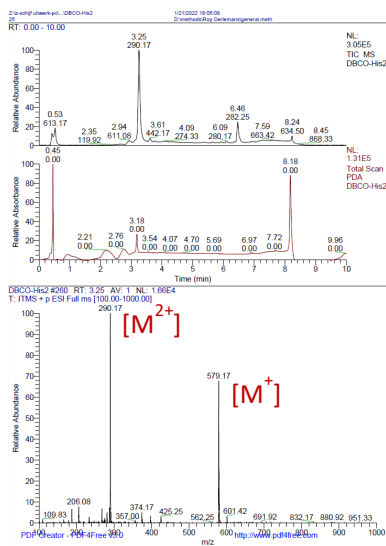

SI Figure. 5 Structure, Mass, and UV spectra of SPPS synthesized DBCO-His<sub>2</sub>. A) Structures, exact mass, and mass over charge prediction (ChemDraw) of DBCO-His<sub>2</sub>. B) Liquid Chromatography Mass Spectrometry chromatographic trace of DBCO-His<sub>2</sub>. C) UV absorption spectrum of DBCO-His<sub>2</sub>. D) Mass spectrum of DBCO-His<sub>2</sub> labeled with with molecular ion peaks.

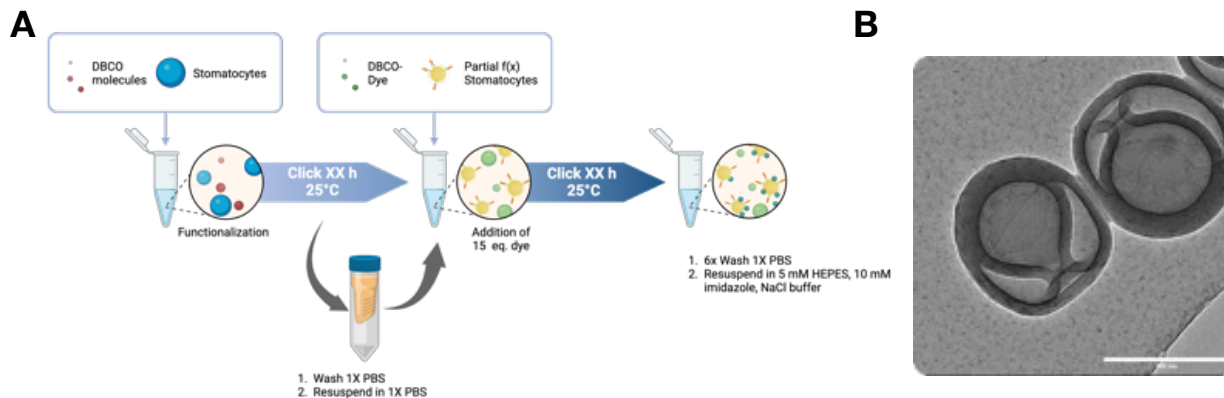

**SI Figure. 6** A) Graphical overview of the two-step surface functionalization of stomatocytes by copper-free click reactions. B) Sample Cryo-TEM micrograph focus of closed neck polymersome stomatocytes clicked with DBCO-AZ405 (scale bar = 300 nm).

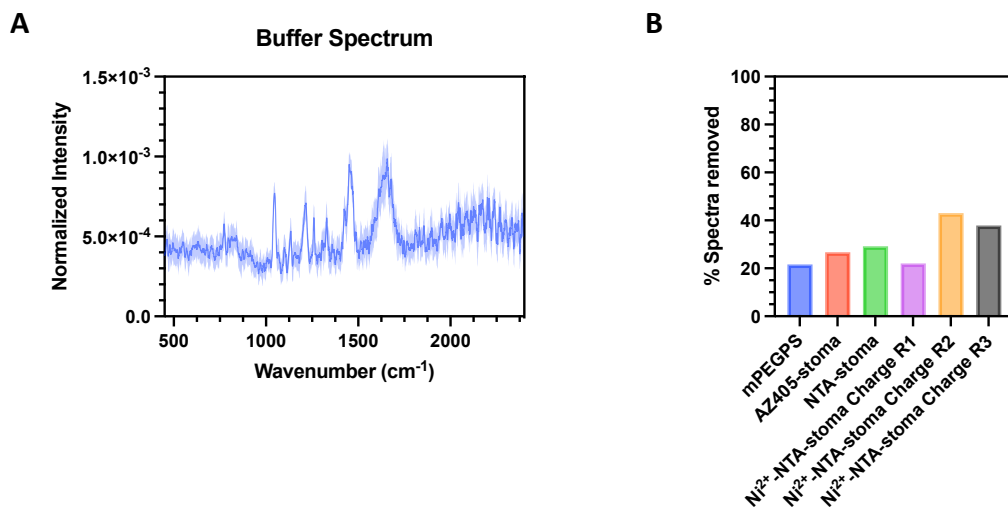

**SI Figure. 7** A) Raman spectrum of storage buffer background. Spectrum shown as mean  $\pm$  s.d. (n=20) after ultrapure water subtraction. Normalized to the area under the curve. B) Percent of spectra removed during pre-processing for each sample due to particle aggregates/clusters.

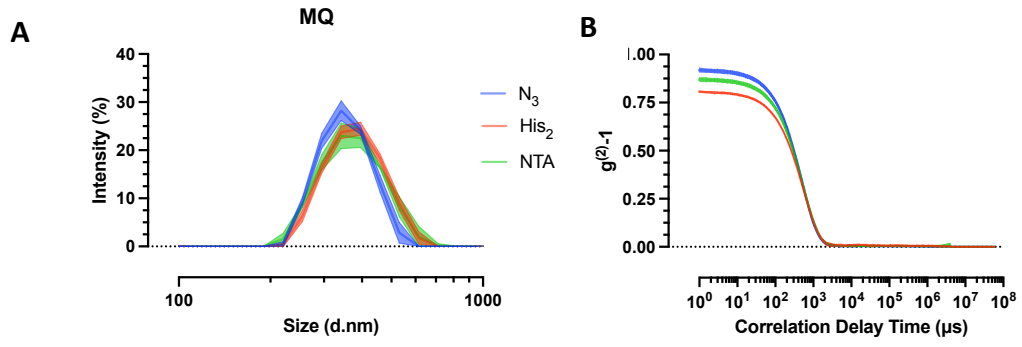

**SI Figure. 8 Dynamic Light Scattering data of assembled stomatocytes and surface functional stomatocytes** A) Intensity % of colloidal diameters recorded. B) Correlation coefficient of analyzed stomatocytes.

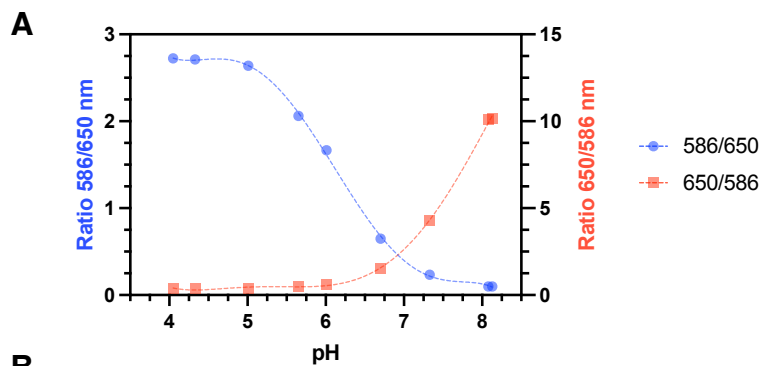

**B**

|                                    | 586/650               | 650/586            |
|------------------------------------|-----------------------|--------------------|
| <b>Fifth order polynomial</b>      |                       |                    |
| <b>Best-fit values</b>             |                       |                    |
| <b>B0</b>                          | 247.7                 | 445.4              |
| <b>B1</b>                          | -222.3                | -400.7             |
| <b>B2</b>                          | 78.81                 | 141.8              |
| <b>B3</b>                          | -13.62                | -24.59             |
| <b>B4</b>                          | 1.144                 | 2.083              |
| <b>B5</b>                          | -0.03751              | -0.06858           |
| <b>95% CI (profile likelihood)</b> |                       |                    |
| <b>B0</b>                          | 6.377 to 489.1        | -567.8 to 1459     |
| <b>B1</b>                          | -433.3 to -11.19      | -1287 to 485.3     |
| <b>B2</b>                          | 6.017 to 151.6        | -163.8 to 447.3    |
| <b>B3</b>                          | -25.99 to -1.239      | -76.54 to 27.36    |
| <b>B4</b>                          | 0.1066 to 2.182       | -2.273 to 6.439    |
| <b>B5</b>                          | -0.07185 to -0.003174 | -0.2127 to 0.07555 |
| <b>Goodness of Fit</b>             |                       |                    |
| <b>Degrees of Freedom</b>          | 3                     | 3                  |
| <b>R squared</b>                   | 0.9995                | 0.9993             |
| <b>Sum of Squares</b>              | 0.005676              | 0.1000             |
| <b>Sy.x</b>                        | 0.04350               | 0.1826             |
| <b>Number of points</b>            |                       |                    |
| <b># of X values</b>               | 9                     | 9                  |
| <b># Y values analyzed</b>         | 9                     | 9                  |

**SI Figure. 9** Calibration curve of the ratiometric dye C-SNARF 4F A) C-SNARF 4F emission peaks ratios in 5 mM HEPES, 10 mM NaCl, Imidazole. B) Fifth order polynomial fit of the ratiometric dye.

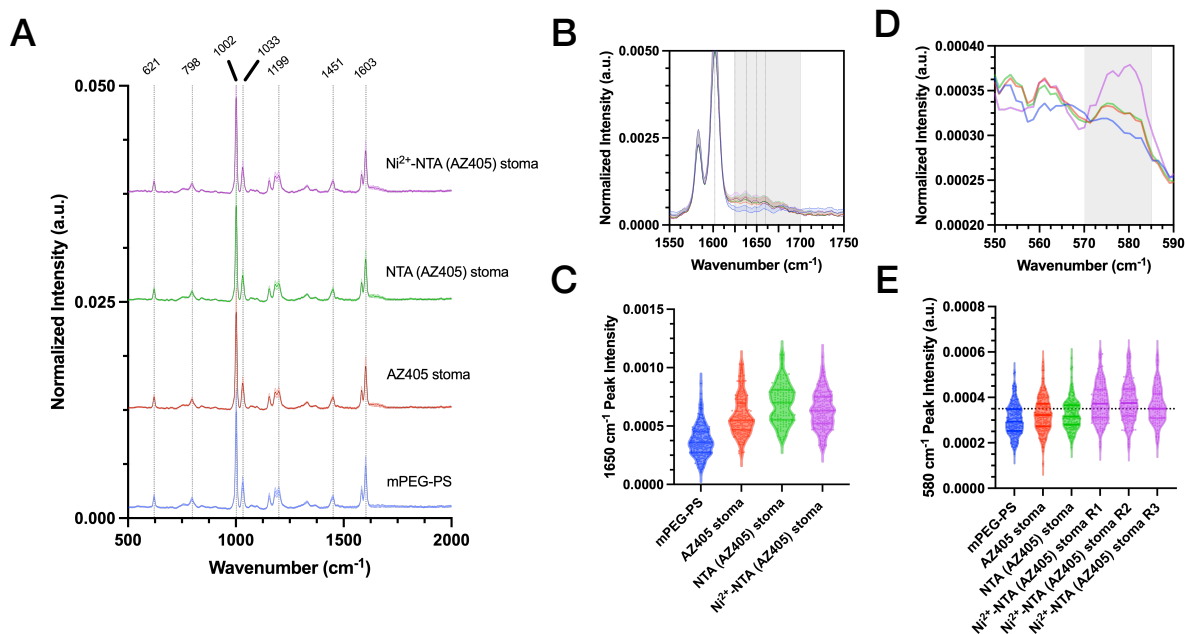

**SI Figure. 10 SPARTA analysis of stomatocytes.** A) Offset mean single particle Raman spectra of methoxy-terminated, dye-functionalized, NTA and dye functional, and nickel charged PEG-PS stomatocytes with primary peak assignments (mean  $\pm$  s.d.,  $n > 180$  particles per sample). B) Mean Raman spectra across each single particle within a sample, cropped to the aromatic double-bonded region (mean  $\pm$  s.d.,  $n > 180$  particles per sample). C) Violin plots summarizing the  $1650 \text{ cm}^{-1}$  peak intensity across individual particles and between sample types (center line, median; upper and lower line, interquartile range). D) Mean single particle Raman spectra zoomed in on the hypothesized  $\text{Ni}^{2+}$ -NTA mean signal across different sample types at  $570 \text{ cm}^{-1}$  (mean  $\pm$  s.d.,  $n > 180$  particles per sample). E) Violin plots of the  $\text{Ni}^{2+}$ -NTA peak at  $580 \text{ cm}^{-1}$  peak intensity across samples ( $n = 77$ - $227$  particles per sample type; center line, median; upper and lower line, interquartile range). Dashed line shows upper quartile of the control sample (mPEG-PS).

**Table 1. Primary Peak Assignment of Particle Raman Spectra**

| Assignment                          | Wavenumber ( $\text{cm}^{-1}$ ) |
|-------------------------------------|---------------------------------|
| Ring deformation                    | 621                             |
| C-H out of plane deformation        | 798                             |
| Ring breathing                      | 1002                            |
| C-H in plane deformation            | 1033                            |
| C-C stretch                         | 1154                            |
| $\text{C}_6\text{H}_5$ -C vibration | 1199                            |
| C-H deformation                     | $\sim 1331$                     |
| $\text{CH}_2$ scissoring            | 1451                            |
| C=C stretch                         | 1583                            |
| Ring stretch                        | 1603                            |

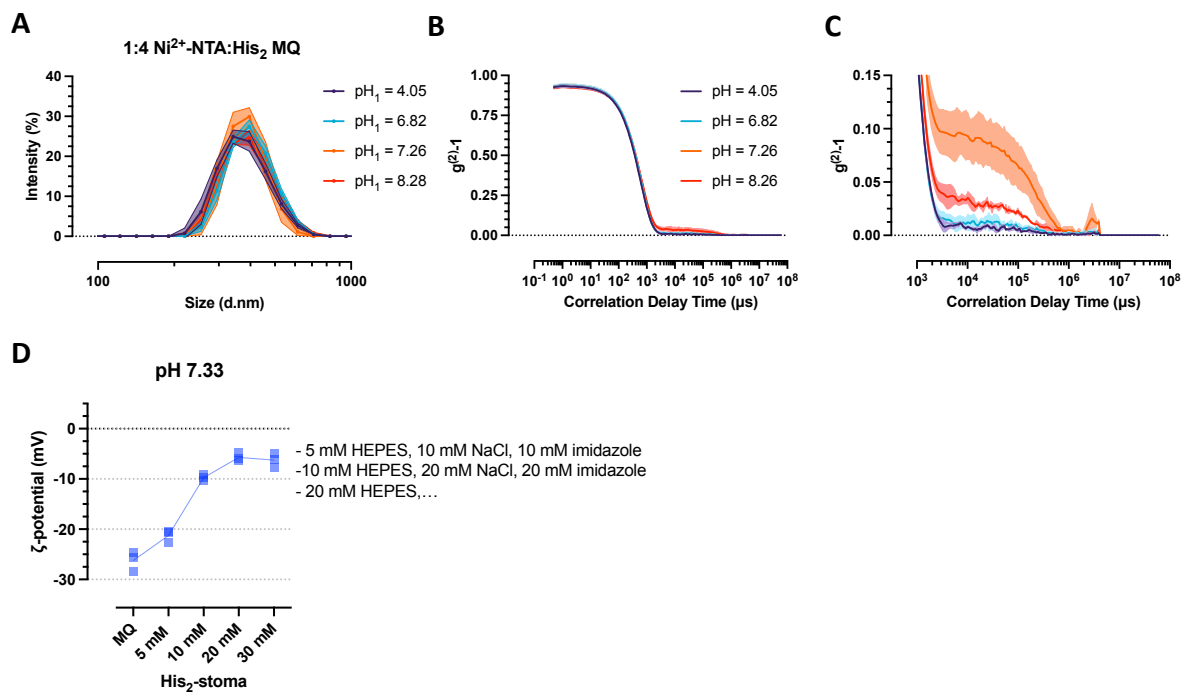

**SI Figure. 11** A) Intensity % of stomatocyte cluster hydrodynamic diameters as a function of pH in MQ. B) Correlation function associated with intensity measurements in graph A. C) Correlation function focus at longer delay times indicative of larger colloidal species. D) Zeta-potential measurements of His<sub>2</sub>-stomatocytes at pH 7.33 as a function of salt concentrations.

**Table 2. Fluorescence intensity output of click reactions in 1X PBS with pH-sensitive ligands**

| Stomatocyte type                  | Reaction time (min) | Clicked Surface coverage ratio (ligand+dye/dye) | Coverage with pH sensitive ligand (%) |
|-----------------------------------|---------------------|-------------------------------------------------|---------------------------------------|
| Nitrilotriacetic acid-stomatocyte | 30                  | 0.417 ± 0.0421                                  | 58.3 ± 4.21                           |
|                                   | 60                  | 0.212 ± 0.0145                                  | 78.7 ± 1.45                           |
| Histidine-stomatocyte             | 0                   | 0                                               | 0                                     |
|                                   | 5                   | 0.389                                           | 61.1                                  |
|                                   | 7.5                 | 0.203                                           | 79.6                                  |
|                                   | 10                  | 0.140                                           | 85.9                                  |
|                                   | 30                  | 0.054                                           | 94.5                                  |



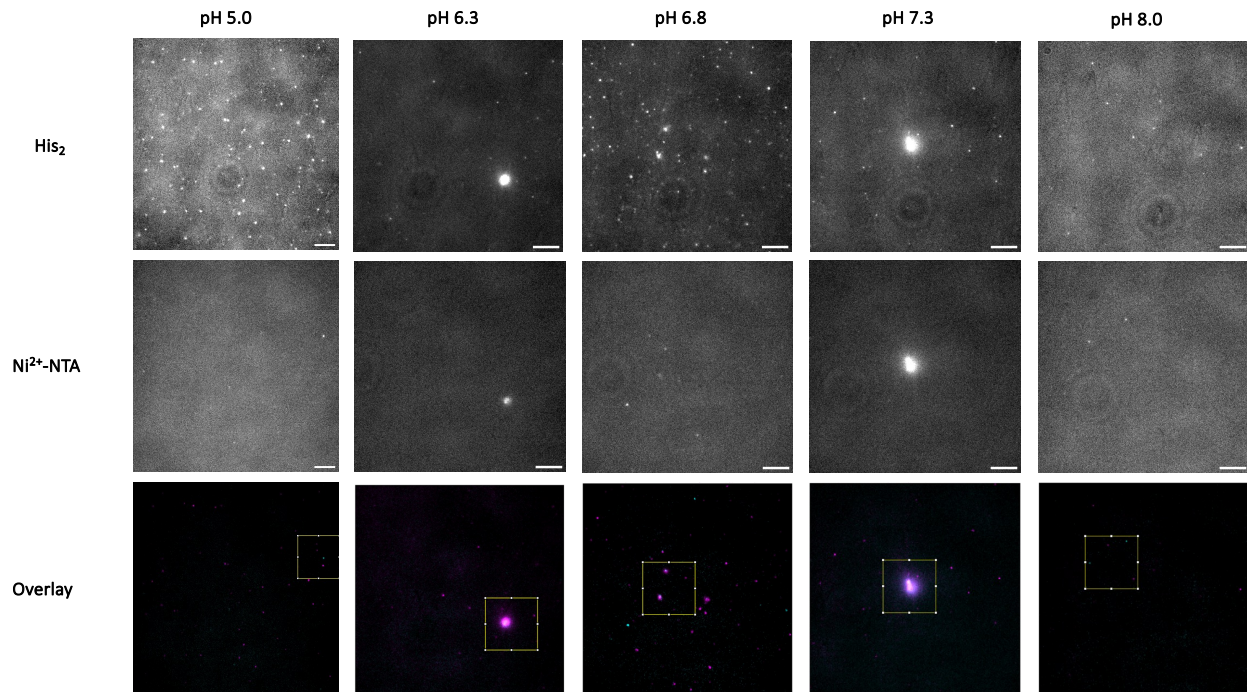

**SI Figure. 12 A)** Representative fluorescence microscopy images (on glass) of AF488 and AZ647 channels depicting the different particle types at different pHs, overlay and area crops of sedimented Ni<sup>2+</sup>-NTA- (cyan) and histidine stomatocytes (magenta) populations mixed at a 1 to 1 ratio at different pHs (Scale bar=5  $\mu$ m).

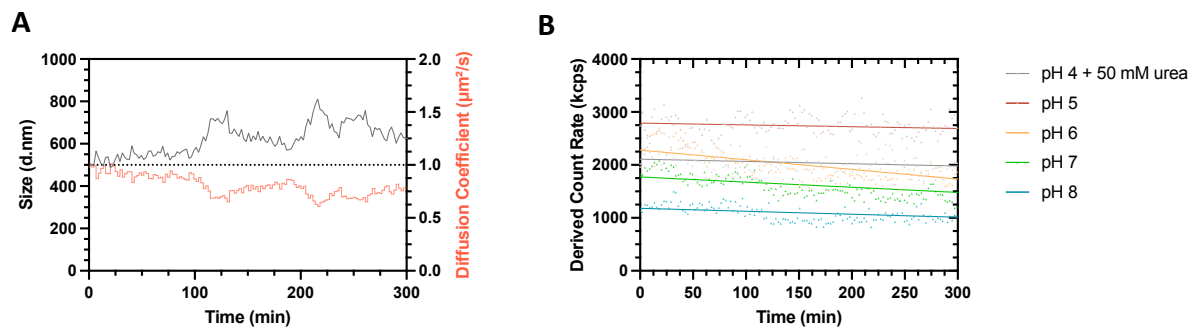

**SI Figure. 13 A)** Diffusion coefficient and  $Z_{AVG}$  of clustering stomatocyte sample recorded over time (50 mM urea). **B)** Derived count rates and linear fits of clustering stomatocyte mixtures (linear fits included to show trends of derived count rate increases or drops).
